# Supplementary material for: A DFT and TD-DFT Study of Two Hydralazine Derivatives for Organic Solar Cells and Nonlinear Optical Applications
Source: Hindawi journal article supplement (doi:10.1155/2023/2162991), 2023-12-08
Supplement: f1 [file 2162991.f1.docx]

**A DFT and TD-DFT study of two hydralazine derivatives for organic solar cells and non-linear optical applications**

Remi Nkeih Tamighang1, Dodo Lydie Ajifack1, Numbonui Stanley Tasheh1, Nyiang Kennet Nkungli1, Charly Tedjeuguim Tsapi2,and Julius Numbonui Ghogomu1,2*

*1Department of Chemistry, Faculty of Science, The University of Bamenda, Cameroon, P.O Box 39, Bambili-Bamenda, Cameroon.*

*2University of Dschang, Faculty of Science, Department of Chemistry, Research Unit of Noxious Chemistry and Environmental Engineering, P.O. Box 67, Dschang-Cameroon*

Correspondence should be addressed to Julius Numbonui Ghogomu, [ghogsjuju@hotmail.com](mailto:ghogsjuju@hotmail.com)

**Table S1:** DFT/ BP86-D3(BJ)/def2-TZVP optimized geometrical Cartesian coordinates of **PEPH**. The structure is at global minimum (no imaginary frequency).

**Electronic Energy= -853.515945518492 *Hartree***

C 4.60548928715095 1.71866615119948 0.23324951303352

C 2.66392281167708 0.29734402168255 -0.05879855763191

C 3.22935659112651 1.56812723476838 0.18746543519122

C 4.92047225209467 -0.64836098413616 -0.17174211912840

C 5.45566969605633 0.60817795488668 0.04387471139075

C 3.51862613342155 -0.82453081312606 -0.22131784671849

C 1.25183864791861 0.01481924774955 -0.14871547849285

C 2.89210249226586 -2.09135954571057 -0.40546292835880

N 0.75284699191589 -1.20657079084918 -0.30561706315163

N 1.58939486655691 -2.27414887326463 -0.42328850482551

N 0.37011962118317 1.08786598515568 -0.07095236275732

N -0.99468310857659 1.00654591769666 -0.31625225430821

C -1.70950614213842 0.27112013378151 0.47999722493433

C -1.22811029825611 -0.42507594888724 1.70782944994414

C -3.15278308143976 0.18888640267931 0.12863575927996

C -5.28222460894776 -0.40090785262649 0.78241056827405

C -3.61907235485450 0.61340014585401 -1.12913329492757

C -4.97885993881189 0.52942566822314 -1.40487999740255

C -5.83681690402905 0.01191489797942 -0.43042937139474

N -3.97639504194207 -0.32036366780556 1.06660128643171

H 2.59053218446009 2.43240630958430 0.37314635441346

H 5.03650927778634 2.70153353454655 0.42719654453926

H 6.53715628850749 0.74408715839247 0.08144020816640

H 5.56863643144781 -1.51695656367421 -0.30154795936021

H 3.50046190045958 -2.99171059600868 -0.53029063222013

H 0.73654119105835 1.93429479702959 -0.49922126702352

H -2.04172641372654 -0.48680470019056 2.43878325498007

H -0.35747289437171 0.09968221850324 2.12478330757083

H -0.90526610665105 -1.44453598572072 1.44824653264456

H -2.90525345682434 0.99220661140772 -1.85848010294865

H -5.36652311866550 0.85277691101333 -2.37218033116630

H -6.90883933839411 -0.07960108199485 -0.60729889624417

H -5.91737585745779 -0.81980389813866 1.56848581726668

**Table S2:** DFT/ BP86-D3(BJ)/def2-TZVP optimized geometrical Cartesian coordinates of **PPEH**. The structure is at global minimum (no imaginary frequency).

**Electronic Energy= -869.558973870746 *Hartree***

C -4.58728048063229 -1.72827597486053 0.21729373582878

C -2.65051772907534 -0.29878349074784 -0.06136551848973

C -3.21166806253008 -1.57387870769015 0.17235582923558

C -4.90967764442288 0.64206289249484 -0.16351293883894

C -5.44074542605394 -0.61822155553193 0.03969053327565

C -3.50838122629593 0.82245712349352 -0.21215575546194

C -1.24037899745987 -0.01048686201400 -0.14981714157034

C -2.88530769294479 2.09278148505704 -0.38307754061775

N -0.74446526541688 1.21228035848869 -0.29551823189567

N -1.58325940141979 2.27994744492844 -0.40005364478350

N -0.35452089397052 -1.08436988716280 -0.08942499379485

N 1.00906281915126 -1.00041815265127 -0.31337380836693

C 1.71495887641486 -0.25636659174975 0.48433773275604

C 1.23034053264866 0.44756402723747 1.70655706260933

C 3.15508874467678 -0.18031321449517 0.13968664262476

C 5.29267019034702 0.36372461938120 0.74239488286163

C 3.63793478760439 -0.59358065924786 -1.12105869060924

C 5.76558802364174 -0.08961544743928 -0.49005485470440

N 3.99518583340486 0.31843704173956 1.06597606577229

H -2.57011399339505 -2.43811625338920 0.34834081183646

H -5.01562819528505 -2.71419974388685 0.40117607404380

H -6.52175021743752 -0.75780861366952 0.07634874967362

H -5.56047614025456 1.50992225161604 -0.28427852796366

H -3.49612569813554 2.99280091752486 -0.49757069064142

H -0.71619860161733 -1.92263362293602 -0.53762844235094

H 2.04030532183622 0.50899265288022 2.44214503425372

H 0.35854483459703 -0.07500049689763 2.12367707403567

H 0.90880010151117 1.46652297608724 1.44390668796900

H 2.93992281052387 -0.94629454122334 -1.88172867218160

H 6.83146162512765 -0.06408362366317 -0.73164417469049

H 5.97499315790182 0.77343468864539 1.49265854000522

N 4.93530800696002 -0.56459604031820 -1.43393482982014

**Figure S1**: Linear regression of PEPH and PPEH at B86/Def2-TZVP level of theory

**Table S3:** Computed cationic (, anionic ( and neutral forms in eV at B2PLYP-D3(BJ)/def2-tzvpp and M06-2X(D3zero)/def2-tzvpp levels of theory in gas phase

| **Functional** | **Molecule** |  |  |  |
| --- | --- | --- | --- | --- |
| B2PLYP | PEPH | 23174.341 | 23174.530 | 23167.216 |
| PPEH | 23610.034 | 23610.422 | 23602.701 |
| M06-2X | PEPH | 23213.629 | 23213.317 | 23206.196 |
| PPEH | 23649.998 | 23649.690 | 23642.376 |

**Table S4:** First static hyperpolarizabilities () of the studied compounds

| Molecule | Functional |  |  |  |  |
| --- | --- | --- | --- | --- | --- |
| PEPH | CAM-B3LYP | 23.96780 | 8.82612 | -6.99044 | 164.43113 |
| wB97-XD | 37.64480 | 7.58746 | -6.20817 | 178.30633 |
| PPEH | CAM-B3LYP | -343.26400 | 0.63478 | -32.38420 | -203.93319 |
| wB97-XD | -302.25200 | -0.36356 | -32.31840 | -162.40327 |
| PNA | CAM-B3LYP | 1456.62000 | 0.00135 | -1.83050 | 1282.56640 |
| wB97-XD | 1406.67000 | 0.00102 | -1.77112 | 1237.19820 |

**Table S5:** First static hyperpolarizabilities () of the studied compounds

| Molecule | Functional |  |  |  |  |
| --- | --- | --- | --- | --- | --- |
| PEPH | CAM-B3LYP | 8.82612 | 14.30380 | -329.58000 | -306.45008 |
| wB97-XD | 7.58746 | 14.68670 | 146.24900 | -306.26484 |
| PPEH | CAM-B3LYP | 0.63478 | 8.25030 | -353.59400 | -344.70892 |
| wB97-XD | -0.36356 | 9.32256 | -351.28600 | -342.32700 |
| PNA | CAM-B3LYP | 0.00135 | -0.00234 | 0.00574 | 0.00475 |
| wB97-XD | 0.00102 | -0.00237 | 0.00517 | 0.00382 |

**Table S6:** First static hyperpolarizabilities () of the studied compounds

| Molecule | Functional |  |  |  |  |
| --- | --- | --- | --- | --- | --- |
| PEPH | CAM-B3LYP | -6.99044 | 23.96780 | 11.98440 | -4.27521 |
| wB97-XD | -6.20817 | 37.64480 | 12.59300 | -3.73877 |
| PPEH | CAM-B3LYP | -32.38420 | -343.26400 | 4.45827 | -83.80883 |
| wB97-XD | -32.31840 | -302.25200 | 4.37208 | -85.68602 |
| PNA | CAM-B3LYP | -1.83050 | 1456.62000 | -0.00234 | -32.04758 |
| wB97-XD | -1.77112 | 1406.67000 | -3.98930 | -29.93732 |

**Table S7:** First dynamic hyperpolarizabilities () of the studied compounds at frequency, ω = 0.04282 a.u.

| **Molecule** | **Functional** |  |  |  |  |
| --- | --- | --- | --- | --- | --- |
| PEPH | CAM-B3LYP | 43.18950 | 11.42870 | -7.41287 | 196.37469 |
| wB97-XD | 59.22860 | 10.30680 | -6.52721 | 213.40835 |
| PPEH | CAM-B3LYP | -403.61000 | 2.99352 | -35.44270 | -253.80092 |
| wB97-XD | -357.17500 | 1.77631 | -33.08420 | -206.45927 |
| PNA | CAM-B3LYP | 1670.18000 | 0.00103 | -1.94865 | 1485.56153 |
| wB97-XD | 1602.24000 | 0.00072 | -2.03191 | 1420.05337 |

**Table S8:** First dynamic hyperpolarizabilities () of the studied compounds at frequency, ω = 0.04282 a.u.

| **Molecule** | **Functional** |  |  |  |  |
| --- | --- | --- | --- | --- | --- |
| PEPH | CAM-B3LYP | 11.42870 | 14.97200 | -371.24700 | -345.51897 |
| wB97-XD | 10.30680 | 15.59000 | -369.55000 | -344.51587 |
| PPEH | CAM-B3LYP | 2.99352 | 3.66621 | -395.16300 | -385.08733 |
| wB97-XD | 1.77631 | 10.03450 | -393.05400 | -382.98633 |
| PNA | CAM-B3LYP | 0.00103 | -0.00240 | 0.00870 | 0.00653 |
| wB97-XD | 0.00072 | -0.00238 | 0.00716 | 0.00470 |

**Table S9:** First dynamic hyperpolarizabilities () of the studied compounds at frequency, ω = 0.04282 a.u.

| **Molecule** | **Functional** |  |  |  |  |
| --- | --- | --- | --- | --- | --- |
| PEPH | CAM-B3LYP | -7.41287 | 43.18950 | 12.22850 | -4.98508 |
| wB97-XD | -6.52721 | 59.22860 | 12.89330 | -5.50256 |
| PPEH | CAM-B3LYP | -35.44270 | -403.61000 | 8.65046 | -96.91865 |
| wB97-XD | -33.08420 | -357.17500 | 4.45810 | -93.82355 |
| PNA | CAM-B3LYP | -1.94865 | 1670.18000 | -0.00240 | -34.92126 |
| wB97-XD | -2.03191 | 1602.24000 | -4.41392 | -32.24917 |
